# Supplementary material for: Multiple Effects of High Surface Area Hollow Nanospheres Assembled by Nickel Cobaltate Nanosheets on Soluble Lithium Polysulfides
Source: MDPI journal article supplement (doi:10.3390/molecules28041539), 2023-02-05
Supplement: s1 [file s1]

## Supporting Information

### **Multiple Effects of High Surface Area Hollow Nanospheres Assembled by Nickel Cobaltate Nanosheets on Soluble Lithium Polysulfides**

*Jun Pu\*, Xiaomei Zhu, Jie Wang, Shaomeng Yu*

Correspondence: [jpu@ahnu.edu.cn](mailto:jpu@ahnu.edu.cn) (J.P.)

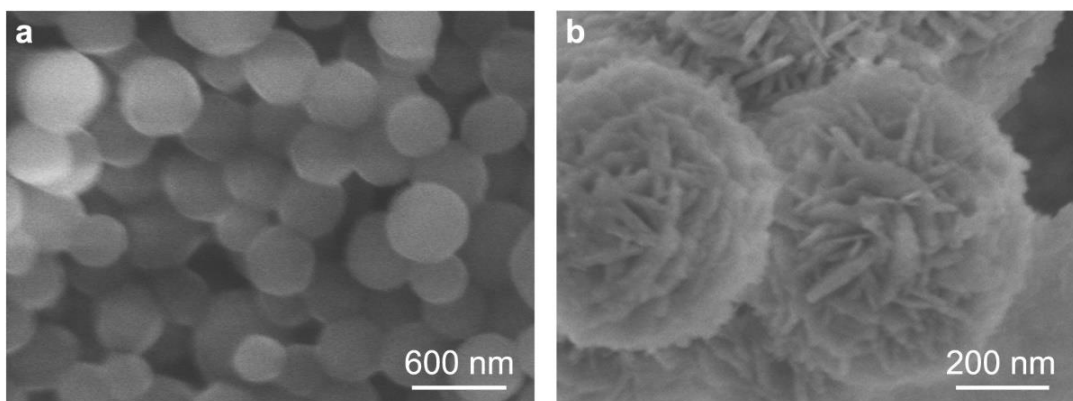

**Figure S1.** SEM images of (a) carbon sphere templates and (b) Co-Ni precursors.

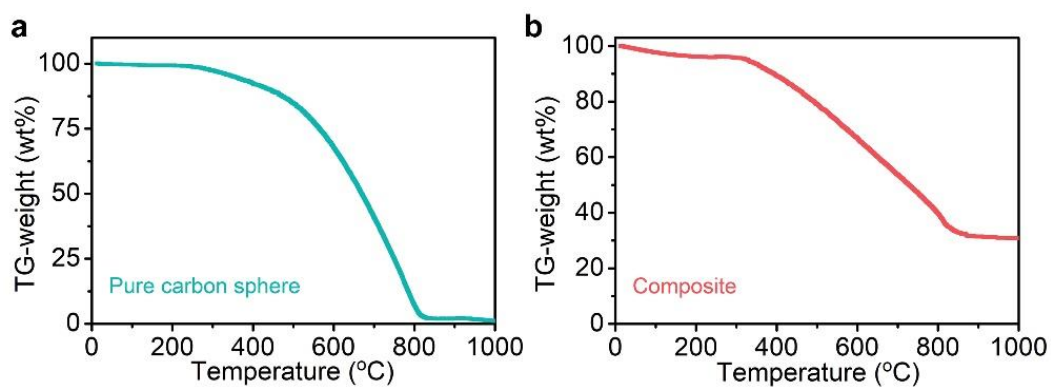

**Figure S2.** TGA results of (a) pure carbon sphere, and (b) precursor composite.

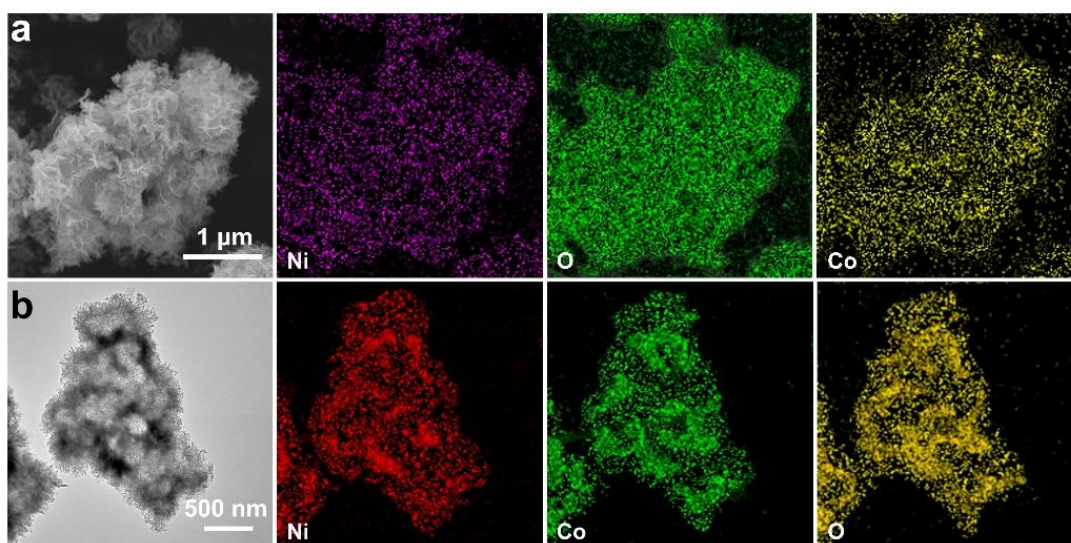

**Figure S3.** Elemental mapping of  $\text{NiCo}_2\text{O}_4$ : (a) SEM, (b) TEM.

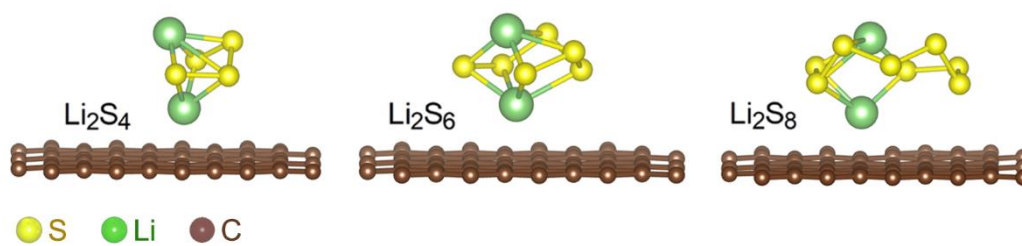

**Figure S4.** Mechanism diagram of interaction between carbon and LiPSs.

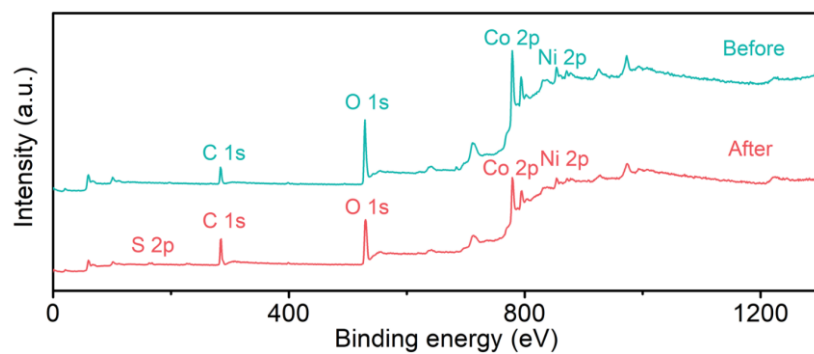

**Figure S5.** XPS survey spectra of  $\text{NiCo}_2\text{O}_4$  before and after  $\text{Li}_2\text{S}_4$  adsorption.

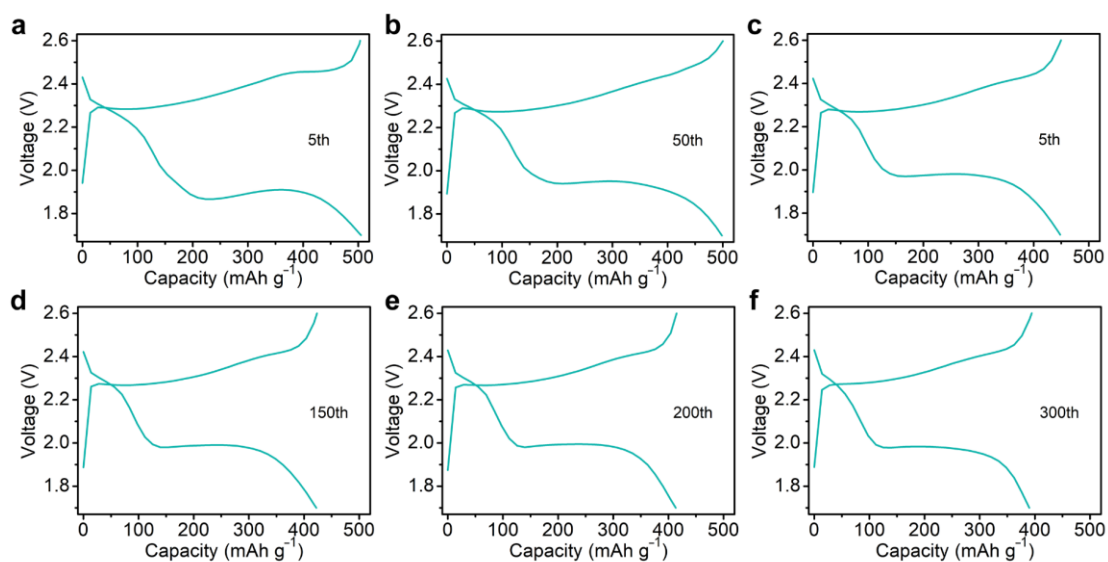

**Figure S6.** Discharge-charge profiles of  $\text{NiCo}_2\text{O}_4@\text{PP}$  cathode at different cycles.

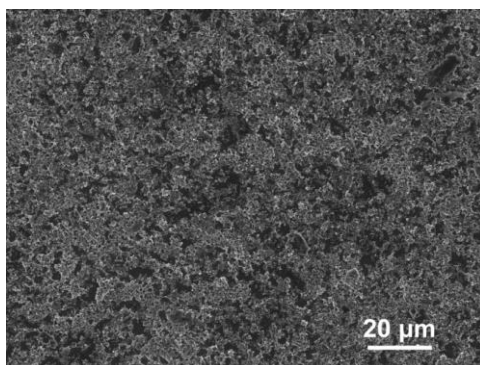

**Figure S7.** The surface SEM of composite separator after cyclic test.
